# Supplementary material
Source: Copernicus journal article supplement (doi:10.5194/egusphere-2025-4330)
Supplement: Supplementary file 1 [file egusphere-2025-4330-supplement.pdf]

**On the Mechanisms that Control the Rainy Season Transition Periods in the Equatorial Congo Basin**

Sarah Worden<sup>1,2\*</sup> and Rong Fu<sup>2</sup>

<sup>1</sup>Jet Propulsion Laboratory, California Institute of Technology, Pasadena, 91109, USA

<sup>2</sup>Atmospheric and Oceanic Sciences Department, University of California Los Angeles, Los Angeles, 90095, USA

\*Corresponding author(s). E-mail(s): [sarah.r.worden@jpl.nasa.gov](mailto:sarah.r.worden@jpl.nasa.gov); Contributing authors: [rfu@atmos.ucla.edu](mailto:rfu@atmos.ucla.edu)

**Contents of this file**

**Supplementary Figures**

Figures S1-S5

**Figure S1**

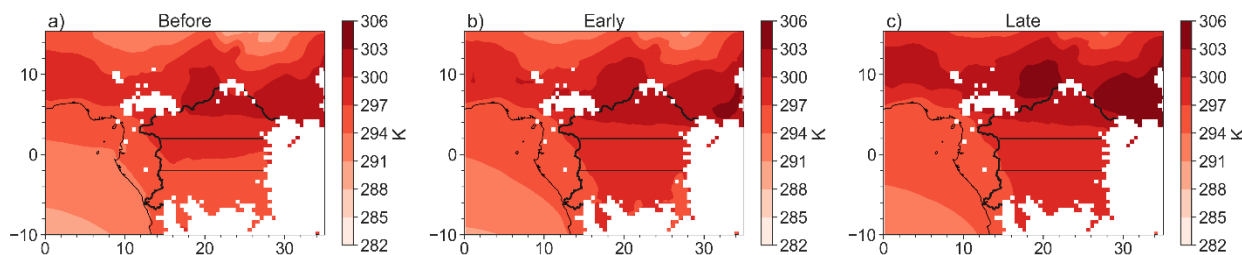

Figure S1: For the transition to the spring RSO: Near surface (925 hPa) temperature for the a) “before” period; b) early transition; and c) late transition. White shades mask out topography above 925 hPa.

**Figure S2**

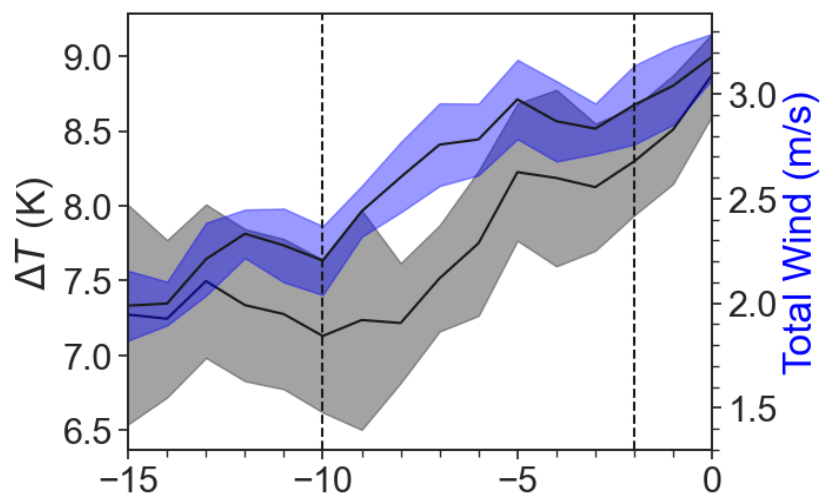

Figure S2: Black line: 925 hPa temperature gradient between the Atlantic Ocean ( $5^{\circ}\text{S} - 2^{\circ}\text{N}, 5^{\circ}\text{W} - 8^{\circ}\text{E}$ ) and northern Congo ( $5^{\circ}\text{N} - 12^{\circ}\text{N}, 15^{\circ}\text{E} - 35^{\circ}\text{E}$ ). Blue line: 925 hPa wind magnitude ( $\sqrt{u^2 + v^2}$ ) in the equatorial and northern Congo coastlines ( $2^{\circ}\text{S} - 6^{\circ}\text{N}, 5^{\circ}\text{E} - 15^{\circ}\text{E}$ ) prior to the spring RSO.

**Figure S3**

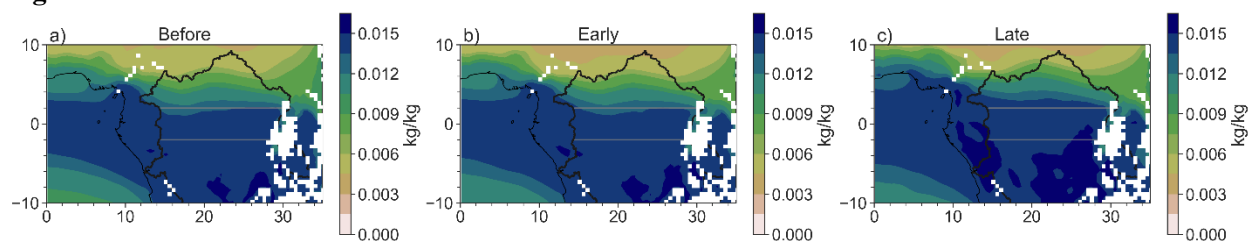

Figure S3: Specific humidity ( $q$ ) averaged between 925-875 hPa for a) the “before” period; b) the early transition period; and c) the late transition period prior to the spring RSO. White shades mask out topography greater than 875 hPa.

**Figure S4**

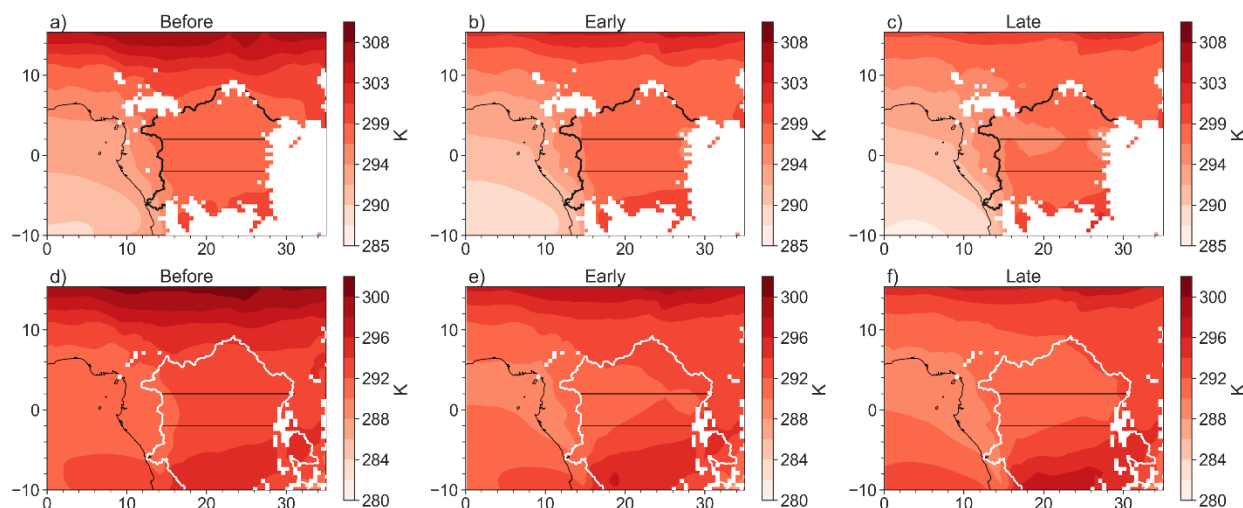

Figure S4: Surface temperatures (white areas mask regions with surface elevation higher than 925 hPa altitude) at 925 hPa for a) the “before” period; b) The early transition period; and c) the late transition period; and at 850 hPa (white areas mask regions with surface elevation higher than 850 hPa) for d) The “before” period; e) the early transition period; and f) the late transition period prior to the fall RSO. 850 hPa is representative of near-surface temperatures in the southern Congo (below 2°S). Prior to the fall RSO.

**Figure S5**

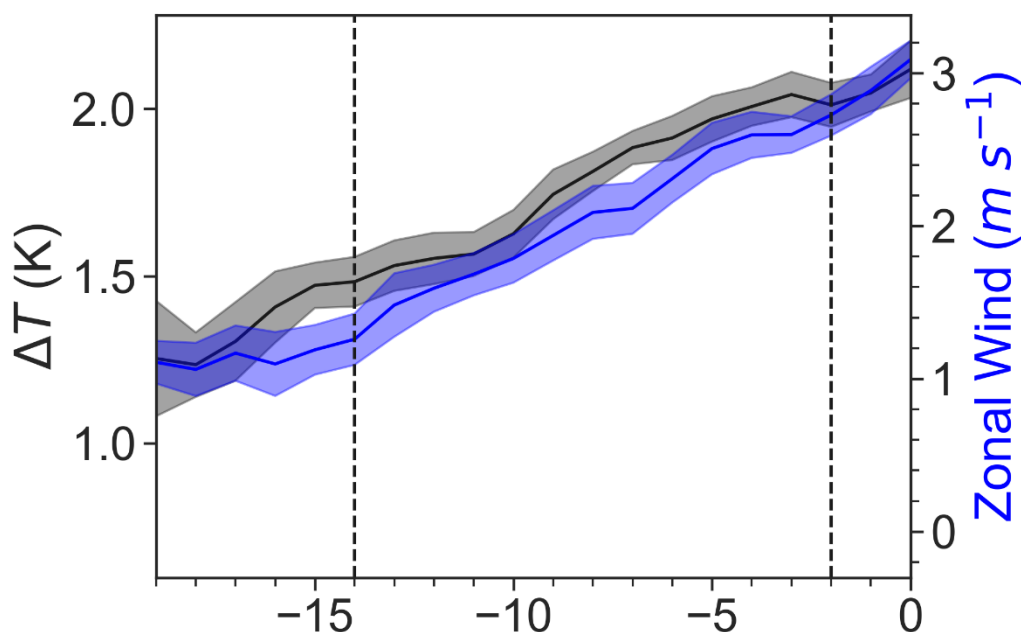

Figure S5: Zonal temperature gradient (black,  $\Delta T$ ) and the zonal wind component (blue, m/s). Both are between 5°S – 5°N and 5°E – 15°E prior to the fall RSO.
